# Supplementary material
Source: PubMed Central journal article supplement (PMC7007399)
Supplement: NIHMS1543674-supplement-1.pdf [file NIHMS1543674-supplement-1.pdf]

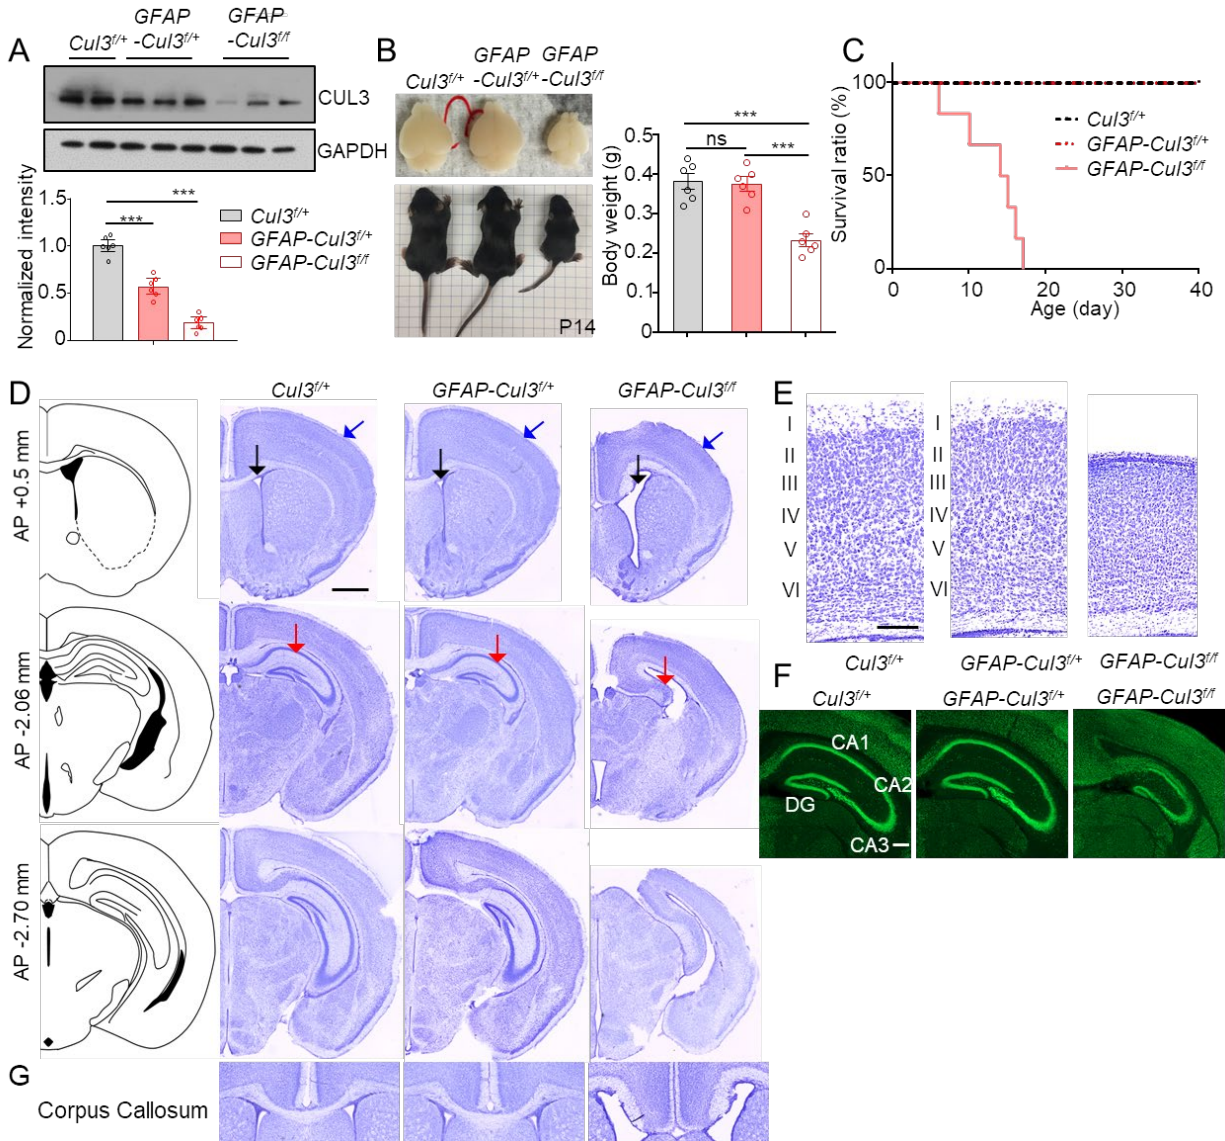

**Figure S1. Premature death and brain deficits in *GFAP-Cul3*<sup>fl/fl</sup> mice. Related to Figure 1.** (A) Reduced CUL3 level in *GFAP-Cul3*<sup>+/+</sup> and *GFAP-Cul3*<sup>fl/fl</sup> mice. Brains were isolated from P14 mice and blotted for CUL3. n = 6 mice for each genotype; *Cul3*<sup>+/+</sup> (1.0 ± 0.07) vs *GFAP-Cul3*<sup>+/+</sup> (0.5 ± 0.11), p < 0.0001; *Cul3*<sup>+/+</sup> vs *GFAP-Cul3*<sup>fl/fl</sup> (0.2 ± 0.08), p < 0.0001;  $F_{(2,15)} = 127.6$ , p < 0.0001; One-way ANOVA followed by Tukey's post hoc test. (B) Reduced brain size and body weight in *GFAP-Cul3*<sup>fl/fl</sup> mice at the age of P14 (n = 6 mice for each genotype; *Cul3*<sup>+/+</sup> (0.4 ± 0.02 g) vs *GFAP-Cul3*<sup>fl/fl</sup> (0.2 ± 0.02 g), p < 0.0001; *GFAP-Cul3*<sup>+/+</sup> (0.4 ± 0.02 g) vs *GFAP-Cul3*<sup>fl/fl</sup>, p = 0.0001;  $F_{(2,15)} = 22.75$ , p < 0.0001; One-way ANOVA followed by Tukey's post hoc test. (C) Reduced lifespan of *GFAP-Cul3*<sup>fl/fl</sup> mice. (D-G) Enlarged ventricles, Scale bar, 1 mm (D), reduced cortical thickness, Scale bar, 100 μm (E), deformed hippocampus Scale bar, 500 μm (F) and agenesis of the corpus callosum (G). Data were shown as mean ± SEM. \*p < 0.05, \*\*p < 0.01, \*\*\*p < 0.001; ns, no significant difference.

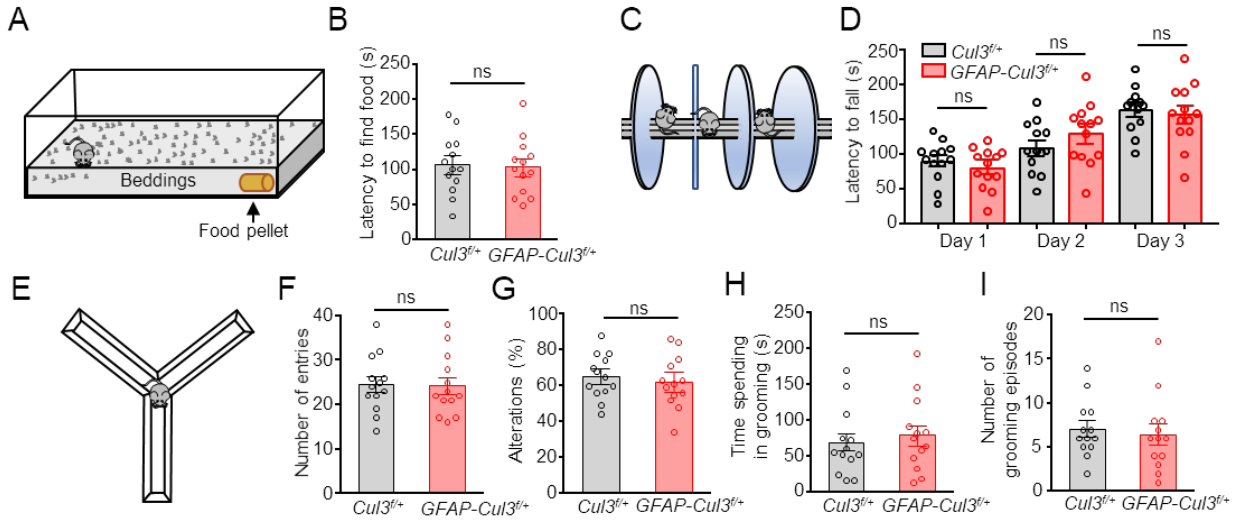

**Figure S2. *GFAP-Cul3<sup>fl/+</sup>* mice did not show difference in motor function, grooming, working memory and olfactory behavior. Related to Figure 1.** (A) Schematic diagram for buried food-seeking tests. (B) Normal food finding in buried food-seeking tests.  $n = 13$  mice for each genotype;  $p = 0.7911$ ;  $U = 79$ ; Mann-Whitney test. (C) Schematic diagram for accelerated rotarod tests. (D) Normal motor performance in accelerated rotarod test.  $n = 13$  mice for each genotype; *Cul3<sup>fl/+</sup>* vs *GFAP-Cul3<sup>fl/+</sup>* on Day 1,  $p = 0.4401$ ,  $U = 69$ ; *Cul3<sup>fl/+</sup>* vs *GFAP-Cul3<sup>fl/+</sup>* on Day 2,  $p = 0.2807$ ,  $U = 63$ ; *Cul3<sup>fl/+</sup>* vs *GFAP-Cul3<sup>fl/+</sup>* on Day 3,  $p = 0.5193$ ,  $U = 71.5$ ; Mann-Whitney test. (E) Schematic diagram for Y-maze tests. (F) Unaltered arms entries in Y-maze tests.  $n = 13$  mice for each genotype;  $p = 0.6761$ ;  $U = 76$ ; Mann-Whitney test. (G) Unaltered alterations percentile in Y-maze tests.  $n = 13$  mice for each genotype;  $p = 0.5528$ ;  $U = 72.5$ ; Mann-Whitney test. (H) Unaltered grooming time during 15 min home cage activity.  $n = 13$  mice for each genotype;  $p = 0.4871$ ;  $U = 70.5$ ; Mann-Whitney test. (I) Unaltered number of grooming episodes during 15 min home cage activity.  $n = 13$  mice for each genotype;  $p = 0.5167$ ;  $U = 71.5$ ; Mann-Whitney test. Data were shown as mean  $\pm$  SEM. ns, no significant difference.

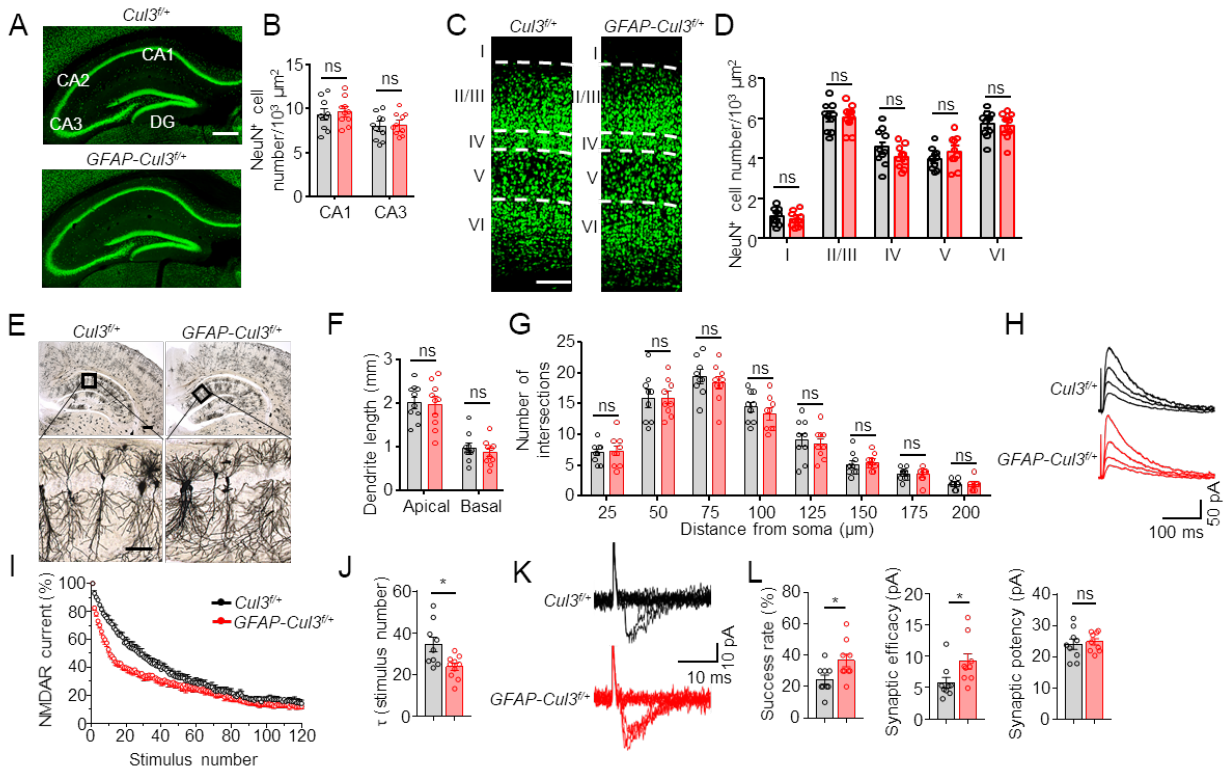

**Figure S3. *GFAP-Cul3<sup>fl/fl</sup>* mice displayed normal cortical development but enhanced glutamatergic release probability. Related to Figure 1.** (A) Normal hippocampal morphology in *GFAP-Cul3<sup>fl/fl</sup>* mice at P60. Sections were stained with antibody against NeuN. Scale bar, 500 μm (B) Quantification of NeuN-expressing cells in hippocampal CA1 and CA3 regions (n = 8 slices from 3 mice per genotype; *Cul3<sup>fl/fl</sup>* vs *GFAP-Cul3<sup>fl/fl</sup>* in CA1, p = 0.6164, U = 43; *Cul3<sup>fl/fl</sup>* vs *GFAP-Cul3<sup>fl/fl</sup>* in CA3, p = 0.7394, U = 45; Mann-Whitney test). (C) No apparent deficits in the somatosensory cortex of *GFAP-Cul3<sup>fl/fl</sup>* mice at P60. Sections were stained with antibody against NeuN. Scale bar, 100 μm. (D) Quantification of NeuN-expressing neurons in the somatosensory cortex. n = 10 slices from 3 mice per genotype; *Cul3<sup>fl/fl</sup>* vs *GFAP-Cul3<sup>fl/fl</sup>* in I, p = 0.4927, U = 40.5; *Cul3<sup>fl/fl</sup>* vs *GFAP-Cul3<sup>fl/fl</sup>* in II/III, p = 0.8946, U = 48; *Cul3<sup>fl/fl</sup>* vs *GFAP-Cul3<sup>fl/fl</sup>* in IV, p = 0.2176, U = 33; *Cul3<sup>fl/fl</sup>* vs *GFAP-Cul3<sup>fl/fl</sup>* in V, p = 0.4696, U = 40; for *Cul3<sup>fl/fl</sup>* vs *GFAP-Cul3<sup>fl/fl</sup>* in VI; p = 0.6990, U = 44.5; Mann-Whitney test. (E) Representative Golgi staining images of apical and basal dendrites in CA1 pyramidal neurons of control and *GFAP-Cul3<sup>fl/fl</sup>* mice. Scale bar, 500 μm (upper panel) 100 μm (lower panel). (F) Quantitative analysis of dendrite length of apical and basal dendrites in CA1 pyramidal neurons (n = 10 neurons of 3 mice per genotype; *Cul3<sup>fl/fl</sup>* vs *GFAP-Cul3<sup>fl/fl</sup>* in Apical, p = 0.7394, U = 45; *Cul3<sup>fl/fl</sup>* vs *GFAP-Cul3<sup>fl/fl</sup>* in Basal, p = 0.6173, U = 43; Mann-Whitney test. (G) Quantitative analysis of dendritic complexity of CA1 pyramidal neurons by Sholl analysis. n = 9 neurons of three mice per genotype; p > 0.05 in all comparisons; Mann-Whitney test. (H) Representative traces of NMDAR currents in the presence of MK-801. (I) Normalized NMDAR currents plotted against stimulus number. (J) Decreased τ values in *GFAP-Cul3<sup>fl/fl</sup>* mice. n = 9 neurons, 3 mice for *Cul3<sup>fl/fl</sup>*; n = 10 neurons, 3 mice for *GFAP-Cul3<sup>fl/fl</sup>*; *Cul3<sup>fl/fl</sup>* (34.5 ± 4.6) vs *GFAP-Cul3<sup>fl/fl</sup>* (23.7 ± 2.4), p = 0.0162; U = 16; Mann-Whitney test. (K) Representative 10 successive individual sweeps of EPSCs evoked by minimal stimulation. (L) Increased success rate, synaptic efficacy, and unaltered synaptic potency in *GFAP-Cul3<sup>fl/fl</sup>* mice. n = 9 neurons from 3 mice per genotype; success rate, *Cul3<sup>fl/fl</sup>* (24.4 ± 3.8) vs *GFAP-Cul3<sup>fl/fl</sup>* (36.7 ± 3.4), p = 0.0369, U = 17; synaptic efficacy, *Cul3<sup>fl/fl</sup>* (5.8 ± 1.2) vs *GFAP-Cul3<sup>fl/fl</sup>* (9.2 ± 1.6), p = 0.0142, U = 13; synaptic potency, *Cul3<sup>fl/fl</sup>* (24.1 ± 2.2) vs *GFAP-Cul3<sup>fl/fl</sup>* (24.8 ± 1.4), p = 0.7304, U = 36; Mann-Whitney test. Data were shown as mean ± SEM. \*p < 0.05; ns, no significant difference.

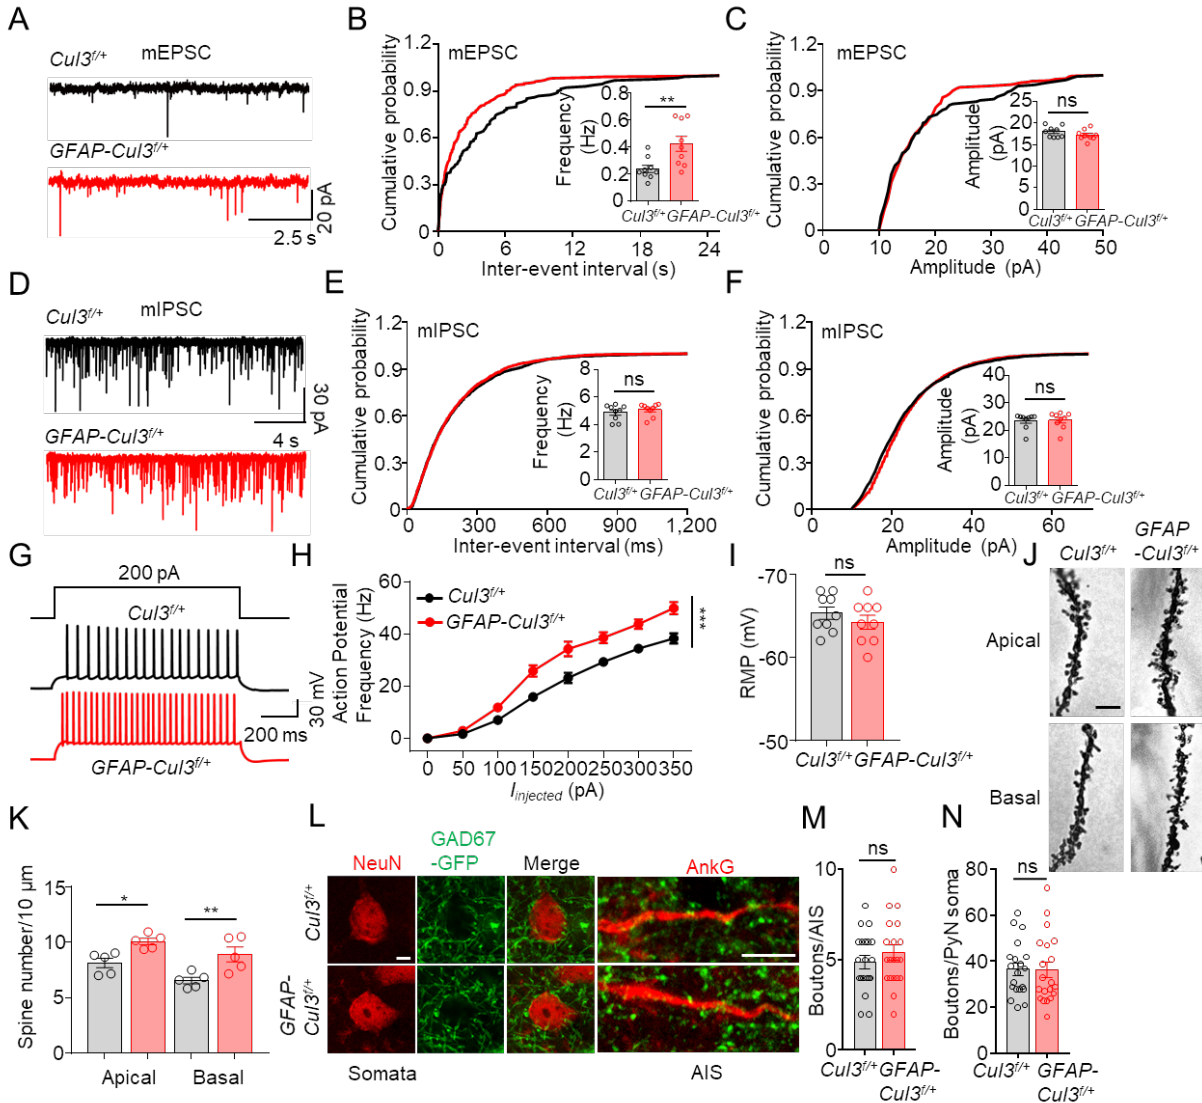

**Figure S4. Disrupted CA1 E-I balance in immature (P14-17) *GFAP-Cul3<sup>fl/fl</sup>* mice. Related to Figure 2.** (A) Representative mEPSCs traces. (B) Increased mEPSC frequency.  $n = 9$  neurons, 3 mice for both genotypes; *Cul3<sup>fl/fl</sup>* ( $0.2 \pm 0.02$  Hz) vs *GFAP-Cul3<sup>fl/fl</sup>* ( $0.4 \pm 0.08$  Hz),  $p = 0.0071$ ;  $U = 11$ ; Mann-Whitney test. (C) No difference in mEPSC amplitude.  $n = 9$  neurons, 3 mice for both genotypes;  $p = 0.2313$ ;  $U = 26.5$ ; Mann-Whitney test. (D) Representative mIPSCs traces. (E) No difference in mIPSC frequency.  $n = 9$  neurons, 3 mice for both genotypes; *Cul3<sup>fl/fl</sup>* ( $17.9 \pm 0.4$  Hz) vs *GFAP-Cul3<sup>fl/fl</sup>* ( $17.3 \pm 0.4$  Hz),  $p = 0.4484$ ;  $U = 31.5$ ; Mann-Whitney test. (F) No difference in mIPSC amplitude.  $n = 9$  neurons, 3 mice for both genotypes; *Cul3<sup>fl/fl</sup>* ( $23.5 \pm 0.9$  pA) vs *GFAP-Cul3<sup>fl/fl</sup>* ( $23.7 \pm 1.0$  pA),  $p = 0.6665$ ;  $U = 35$ ; Mann-Whitney test. (G) Representative spikes traces evoked by depolarizing currents. (H) Firing rate plotted against increasing injected currents.  $n = 9$  neurons, 3 mice for both genotypes;  $p < 0.0001$ ;  $F_{(1, 128)} = 70.54$ ; Two-way ANOVA. (I) Comparable RMP of CA1 neurons.  $n = 9$  neurons, 3 mice for both genotypes;  $p = 0.3653$ ;  $U = 46$ ; Mann-Whitney test. (J) Representative Golgi staining images of spines. Scale bar, 5  $\mu\text{m}$ . (K) Increased spine density in apical and basal dendrites of CA1 *GFAP-Cul3<sup>fl/fl</sup>* pyramidal neurons.  $n = 5$  mice for both genotype; for spine density in apical dendrites, *Cul3<sup>fl/fl</sup>* ( $8.1 \pm 0.44$ ) vs *GFAP-Cul3<sup>fl/fl</sup>* ( $10.1 \pm 0.29$ ),  $p = 0.0079$ ;  $U = 0$ ; Mann-Whitney test; for spine density in basal dendrites, *Cul3<sup>fl/fl</sup>* ( $6.6 \pm 0.30$ ) vs *GFAP-Cul3<sup>fl/fl</sup>* ( $8.9 \pm 0.67$ ),  $p = 0.0159$ ;  $U = 1$ ; Mann-Whitney test. (L) Representative images of GAD67-GFP positive inhibitory synapses onto NeuN positive postsynaptic somata (square image in left; scale 5  $\mu\text{m}$ ) and representative images of GAD67-GFP positive inhibitory synapses onto AnkG positive axon initial segment (AIS) (rectangle image in right; scale 5  $\mu\text{m}$ ). (M) Quantification data of GABAergic boutons/AIS.  $n = 20$  AIS of 3 mice per each genotype;  $p = 0.5070$ ;  $U = 175.5$ ; Mann-Whitney test. (N) Quantification data of GABAergic boutons/somata.  $n = 20$  somata of 3 mice per each genotype;  $p = 0.6631$ ;  $U = 183.5$ ; Mann-Whitney test. Data were shown as mean  $\pm$  SEM. \* $p < 0.05$ , \*\* $p < 0.01$ , \*\*\* $p < 0.001$ ; ns, no significant difference.

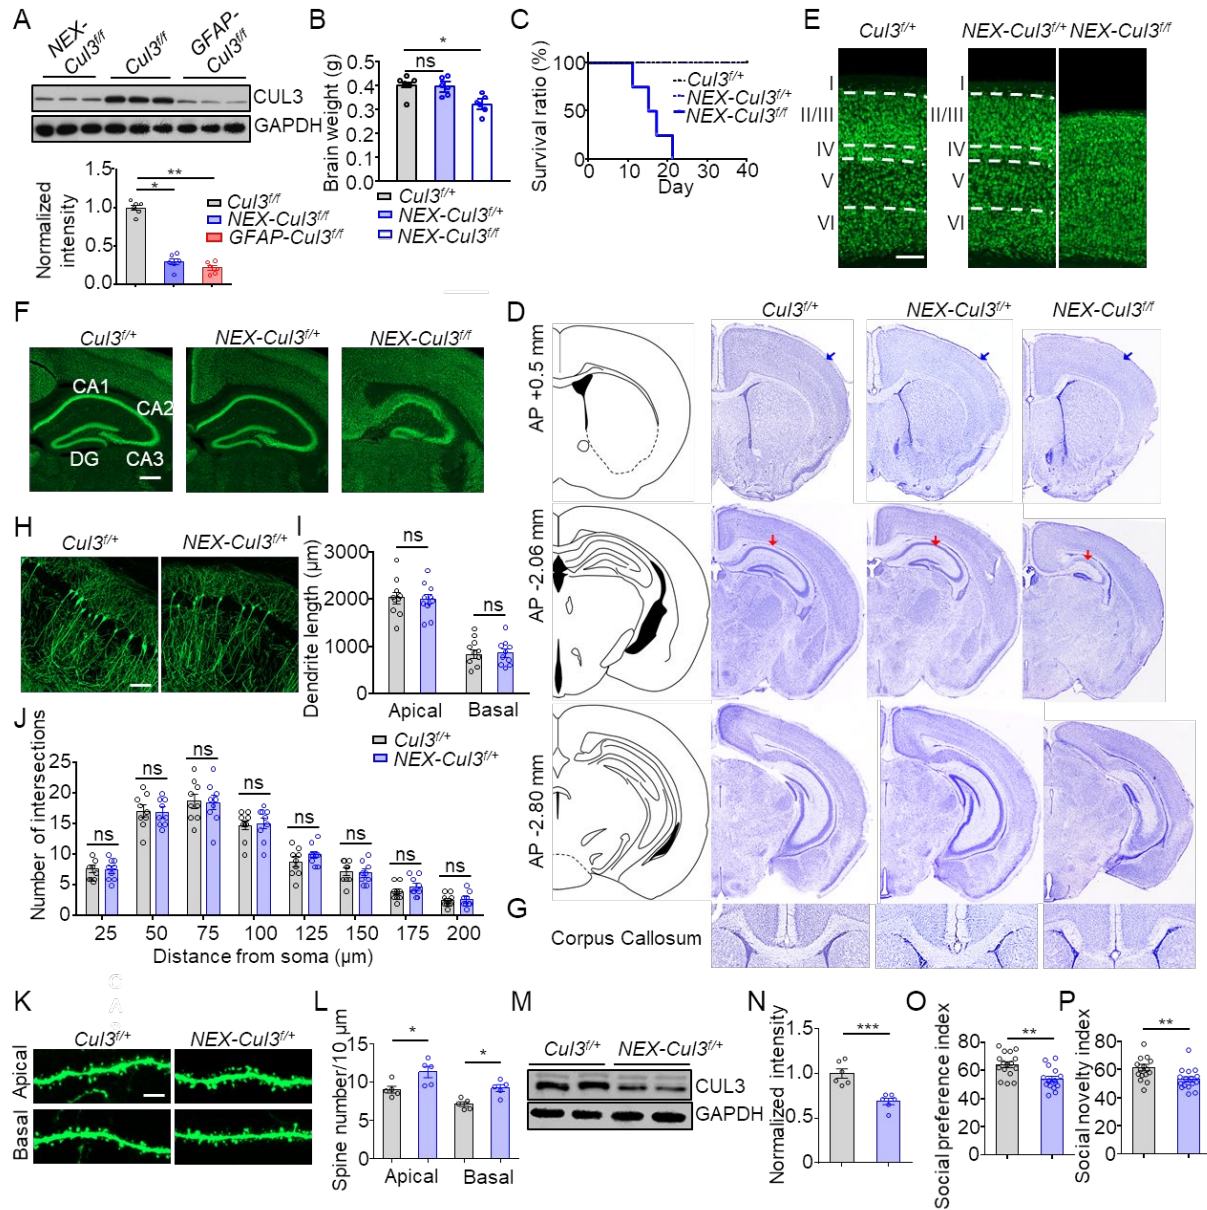

**Figure S5. Premature death and morphological deficits in the brain of *NEX-Cul3<sup>fl/fl</sup>* mice and social deficits in *NEX-Cul3<sup>fl/+</sup>* mice. Related to Figure 3. (A) Reduced CUL3 level in cortical homogenate of *GFAP-Cul3<sup>fl/fl</sup>* and *NEX-Cul3<sup>fl/fl</sup>* mice at the age of P14.  $n = 6$  mice for each genotype; *Cul3<sup>fl/fl</sup>* ( $1.0 \pm 0.05$ ) vs *NEX-Cul3<sup>fl/fl</sup>* ( $0.3 \pm 0.06$ ),  $p = 0.0444$ ; *Cul3<sup>fl/fl</sup>* vs *GFAP-Cul3<sup>fl/fl</sup>* ( $0.2 \pm 0.05$ ),  $p = 0.0019$ ; Kruskal-Wallis ANOVA followed by Dunn's post hoc test. (B) Reduced brain weight of *NEX-Cul3<sup>fl/fl</sup>* mice at the age of P14.  $n = 6$  mice for each genotype; *Cul3<sup>fl/+</sup>* ( $0.4 \pm 0.02$ ) vs *NEX-Cul3<sup>fl/+</sup>* ( $0.4 \pm 0.04$ ),  $p > 0.9999$ ; *Cul3<sup>fl/+</sup>* vs *NEX-Cul3<sup>fl/+</sup>* ( $0.3 \pm 0.04$ ),  $p = 0.0301$ ; Kruskal-Wallis ANOVA followed by Dunn's post hoc test. (C) Reduced lifespan of *NEX-Cul3<sup>fl/fl</sup>* mice. (D-G) Abnormal cortical structure, Scale bar, 1 mm (D), reduced cortical thickness, Scale bar, 100  $\mu\text{m}$  (E), deformed hippocampus Scale bar, 500  $\mu\text{m}$ . (F) and agenesis of the corpus callosum (G). (H) Representative image of hippocampal CA1 neurons visualized by Thy1-GFP. Scale bar, 100  $\mu\text{m}$ . (I) Quantitative analysis of dendrite length of Apical and Basal dendrites in CA1 pyramidal neurons.  $n = 10$  neurons of 3 mice per genotype; for *Cul3<sup>fl/+</sup>* vs *NEX-Cul3<sup>fl/+</sup>* in Apical,  $p = 0.7959$ ,  $U = 46$ ; for *Cul3<sup>fl/+</sup>* vs *NEX-Cul3<sup>fl/+</sup>* in Basal,  $p = 0.8534$ ,  $U = 47$ ; Mann-Whitney test. (J) Quantitative analysis of dendritic complexity of CA1 pyramidal neurons by Sholl analysis.  $n = 9$  neurons of three mice per genotype;  $p > 0.05$  in all comparisons; Mann-Whitney test. (K) Representative images of apical and basal spines of hippocampus CA1 pyramidal neurons. Spines were visualized by Thy1-GFP and those on the secondary/tertiary branches were counted. Scale bar, 5  $\mu\text{m}$ . (L) Increased spine density in apical and basal dendrites of CA1 *NEX-Cul3<sup>fl/+</sup>* pyramidal neurons.  $n = 5$  mice per genotype; for spine density in apical dendrites, *Cul3<sup>fl/+</sup>* ( $9 \pm 0.5$ ) vs *NEX-Cul3<sup>fl/+</sup>* ( $11.3 \pm 0.7$ ),  $p = 0.0317$ ;  $U = 2$ ; spine density in basal**

dendrites, *Cul3<sup>fl/+</sup>* ( $7.1 \pm 0.3$ ) vs *NEX-Cul3<sup>fl/+</sup>* ( $9 \pm 0.5$ ),  $p < 0.0159$ ;  $U = 1$ ; Mann-Whitney test. (M) Representative blots on CUL3 expression. (N) Reduced CUL3 expressions in P60 *NEX-Cul3<sup>fl/+</sup>* mice cortical tissues.  $n = 5$  mice per each group; GAPDH was used as loading controls; *Cul3<sup>fl/+</sup>* ( $1.0 \pm 0.05$ ) vs *NEX-Cul3<sup>fl/+</sup>* ( $0.7 \pm 0.04$ ),  $p = 0.0006$ ; Student's t test. (O) Social preference index in *NEX-Cul3<sup>fl/+</sup>* mice.  $n = 16$  mice per genotype; *Cul3<sup>fl/+</sup>* ( $64.1 \pm 2.1$ ) vs *NEX-Cul3<sup>fl/+</sup>* ( $53.8 \pm 1.9$ ),  $p = 0.003$ ;  $U = 52$ ; Mann-Whitney test. (P) Social novelty index in *NEX-Cul3<sup>fl/+</sup>* mice.  $n = 16$  mice per genotype; *Cul3<sup>fl/+</sup>* ( $61.3 \pm 2.3$ ) vs *NEX-Cul3<sup>fl/+</sup>* ( $53.0 \pm 1.9$ ),  $p = 0.0045$ ;  $U = 54$ ; Mann-Whitney test. Data were shown as mean  $\pm$  SEM. \* $p < 0.05$ , \*\* $p < 0.01$ , \*\*\* $p < 0.001$ ; ns, no significant difference.

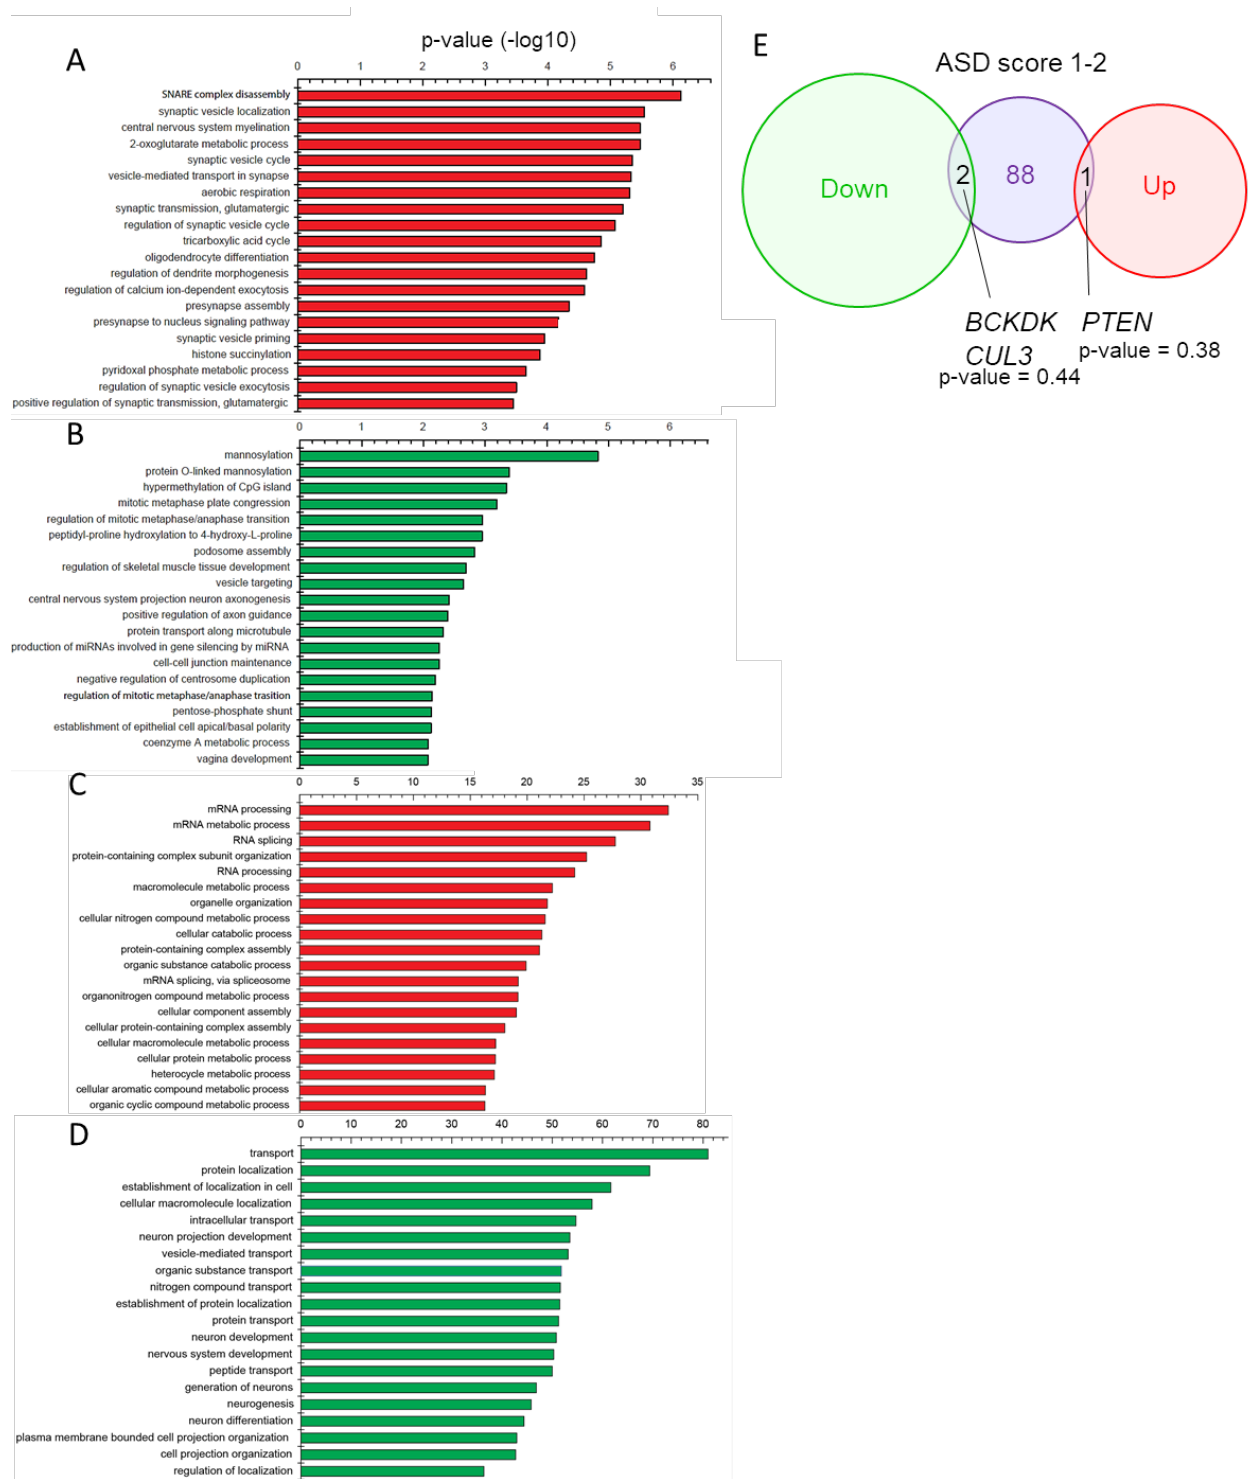

**Figure S6. Altered protein expression profile caused by the loss of *Cul3* in mutant mice. Related to Figure 4.** (A) GO- 'Biological process' analysis on upregulated proteins identified in proteomics analysis, by comparing *GFAP-Cul3<sup>fl/fl</sup>* mice vs. *Cul3<sup>fl/fl</sup>* mice. (B) GO- 'Biological process' analysis on downregulated proteins identified in proteomics analysis, by comparing *GFAP-Cul3<sup>fl/fl</sup>* mice vs. *Cul3<sup>fl/fl</sup>* mice. (C) GO- 'Biological process' analysis on upregulated proteins identified in proteomics analysis, by comparing *GFAP-Cul3<sup>fl/fl</sup>* mice vs. *Cul3<sup>fl/fl</sup>* mice. (D) GO- 'Biological process' analysis on downregulated proteins identified in proteomics analysis, by comparing *GFAP-Cul3<sup>fl/fl</sup>* mice vs. *Cul3<sup>fl/fl</sup>* mice. (E) DE proteins that overlapped with high confident SFARI genes (score 1 and 2 only). Data were analyzed by Fisher's exact test.

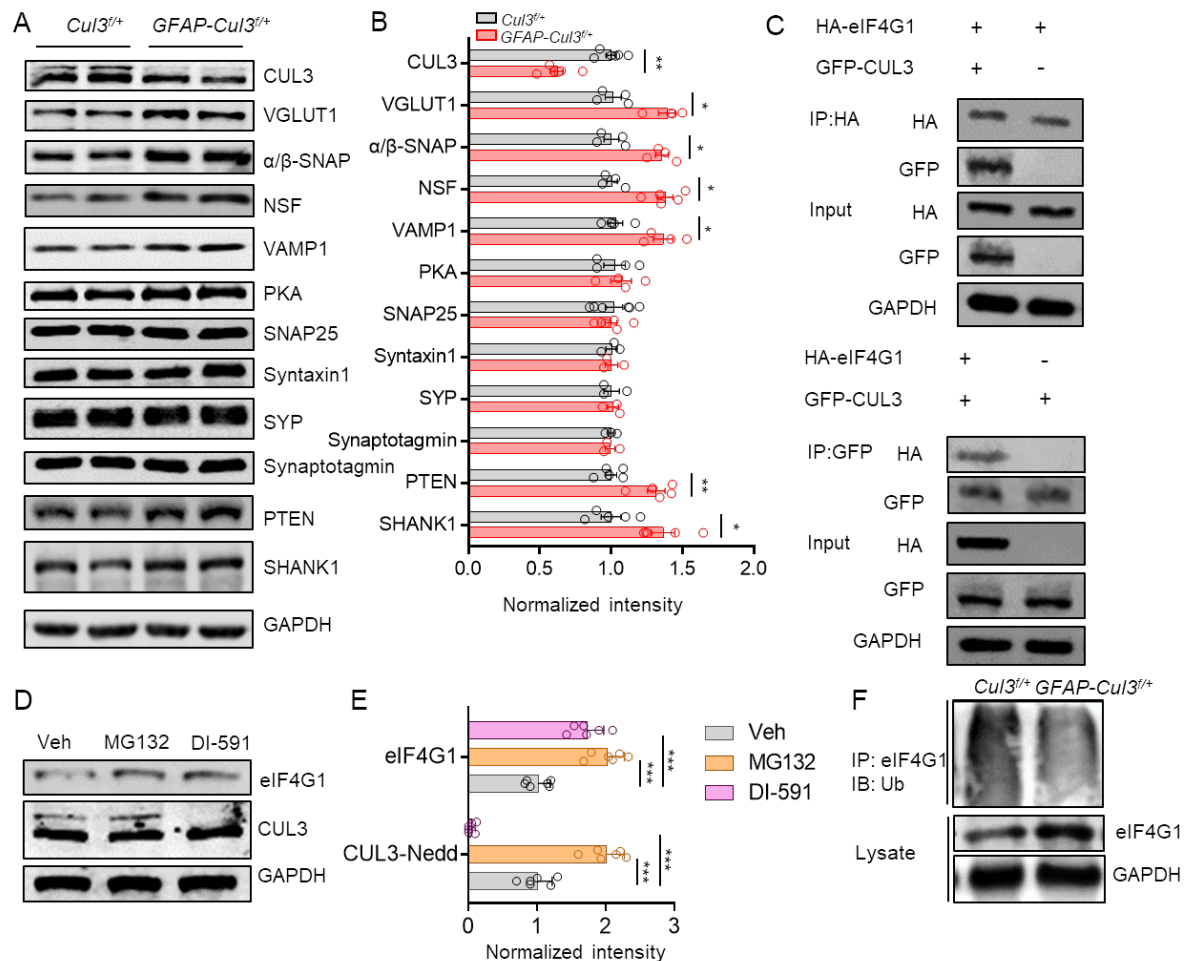

**Figure S7. Enhanced protein translation and reduced eIF4G1 ubiquitination in *GFAP-Cul3<sup>+/+</sup>* neurons. Related to Figure 4.** (A, B) Western blot analysis of interested proteins in the cortex. A, Representative blots. B, Quantitative data.  $n = 3-6$  mice per genotypes; GAPDH was used for loading controls; *Cul3<sup>+/+</sup>* ( $1.0 \pm 0.05$ ) vs *GFAP-Cul3<sup>+/+</sup>* ( $1.35 \pm 0.05$ ),  $p = 0.0286$ ,  $U_{VAMP1} = 0$ ; *Cul3<sup>+/+</sup>* ( $1.0 \pm 0.06$ ) vs *GFAP-Cul3<sup>+/+</sup>* ( $1.38 \pm 0.03$ ),  $p = 0.0159$ ,  $U_{NSF} = 0$ ; *Cul3<sup>+/+</sup>* ( $1.0 \pm 0.05$ ) vs *GFAP-Cul3<sup>+/+</sup>* ( $1.32 \pm 0.06$ ),  $p = 0.0286$ ,  $U_{\alpha/\beta\text{-SNAP}} = 0$ ; *Cul3<sup>+/+</sup>* ( $1.0 \pm 0.06$ ) vs *GFAP-Cul3<sup>+/+</sup>* ( $1.41 \pm 0.06$ ),  $p = 0.0286$ ,  $U_{VGLUT1} = 0$ ; *Cul3<sup>+/+</sup>* ( $1.0 \pm 0.04$ ) vs *GFAP-Cul3<sup>+/+</sup>* ( $0.62 \pm 0.04$ ),  $p = 0.0022$ ,  $U_{CUL3} = 0$ ; *Cul3<sup>+/+</sup>* ( $1.0 \pm 0.07$ ) vs *GFAP-Cul3<sup>+/+</sup>* ( $1.35 \pm 0.09$ ),  $p = 0.019$ ,  $U_{SHANK1} = 0$ ; *Cul3<sup>+/+</sup>* ( $1.0 \pm 0.04$ ) vs *GFAP-Cul3<sup>+/+</sup>* ( $1.29 \pm 0.06$ ),  $p = 0.0079$ ,  $U_{PTEN} = 0$ ; Mann-Whitney test. (C) Co-immunoprecipitation of CUL3 and eIF4G1. HEK293T cells were co-transfected with HA-eIF4G1 and GFP-CUL3. HA or GFP antibodies were used for immunoprecipitation. (D, E) Increased eIF4G1 in neurons treated by MG132 or DI-591. MG132 (10  $\mu$ M) or DI-591 (10  $\mu$ M) was added into culture medium at DIV14 for 48 h. D, Representative blot; E, Quantitative data.  $n = 6$  samples per each group; GAPDH was used for loading controls; for CUL3-Nedd, Veh ( $1.0 \pm 0.10$ ) vs MG132 ( $2.0 \pm 0.12$ ),  $p < 0.001$ ; Veh vs DI-591 ( $0.05 \pm 0.02$ ),  $p < 0.001$ ; for eIF4G1, Veh ( $1.0 \pm 0.08$ ) vs MG132 ( $2.0 \pm 0.11$ ),  $p < 0.001$ ; Veh vs DI-591 ( $1.7 \pm 0.11$ ),  $p < 0.001$ ; One-way ANOVA followed by Tukey's post hoc test. (F) Reduced eIF4G1 ubiquitination in *GFAP-Cul3<sup>+/+</sup>* cortex. eIF4G1 antibody was used for immunoprecipitation and Ub antibody was used for immunoblotting. Data were shown as mean  $\pm$  SEM. \* $p < 0.05$ , \*\* $p < 0.01$ ; ns, no significant difference.



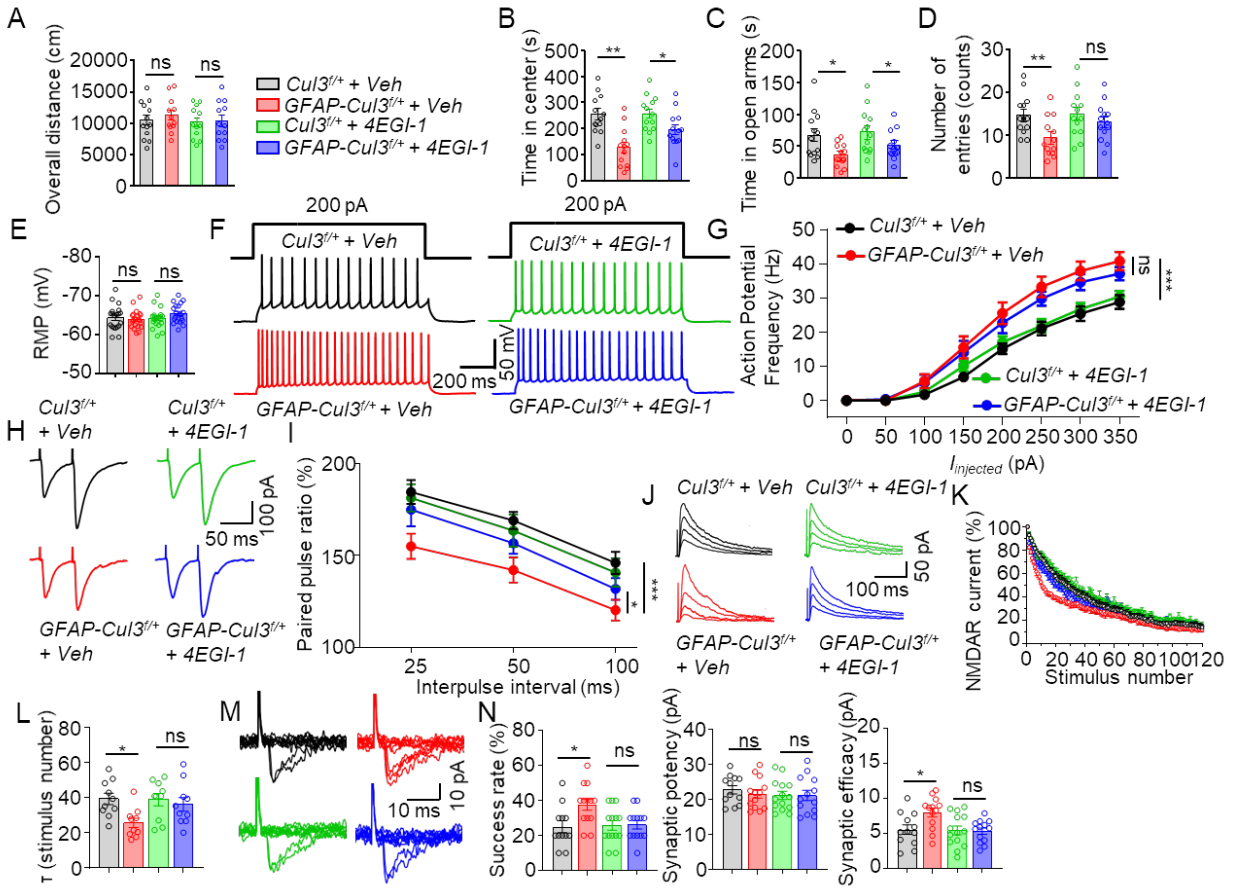

**Figure S8. 4EGI-1 failed to rescue neuronal excitability and anxiety phenotypes in *CUL3* deficiency mice but attenuated glutamate release probability in *CUL3* deficient neurons. Related to Figure 5.** (A) No effect of 4EGI-1 was found on total distance traveled in open field test.  $n = 13$  mice for each group;  $p > 0.9999$  for all comparisons; Kruskal-Wallis ANOVA followed by Dunn's post hoc test. (B) No effect of 4EGI-1 was found on time spent in center by *GFAP-Cul3*<sup>+/+</sup> mice in open field test.  $n = 13$  mice for each group; for Veh-treated *Cul3*<sup>+/+</sup> ( $251 \pm 25.2$  s) vs Veh-treated *GFAP-Cul3*<sup>+/+</sup> ( $133 \pm 21.6$  s),  $p = 0.0020$ ; for 4EGI-1-treated *Cul3*<sup>+/+</sup> ( $252 \pm 18.3$  s) vs 4EGI-1-treated *GFAP-Cul3*<sup>+/+</sup> ( $204 \pm 19.5$  s),  $p = 0.0418$ ; Kruskal-Wallis ANOVA followed by Dunn's post hoc test. (C) No effect of 4EGI-1 was found on time in open arms of *GFAP-Cul3*<sup>+/+</sup> mice in EPM test.  $n = 13$  mice for each group; for Veh-treated *Cul3*<sup>+/+</sup> ( $63.4 \pm 8.2$  s) vs Veh-treated *GFAP-Cul3*<sup>+/+</sup> ( $37.3 \pm 6.4$  s),  $p = 0.0350$ ; for 4EGI-1-treated *Cul3*<sup>+/+</sup> ( $72.7 \pm 10.1$  s) vs 4EGI-1-treated *GFAP-Cul3*<sup>+/+</sup> ( $51.3 \pm 7.1$  s),  $p = 0.0430$ ; Kruskal-Wallis ANOVA followed by Dunn's post hoc test. (D) 4EGI-1 abolished difference in number of entries into open arms between control and *GFAP-Cul3*<sup>+/+</sup> mice in EPM test.  $n = 13$  mice for each group; for Veh-treated *Cul3*<sup>+/+</sup> ( $14.4 \pm 1.6$ ) vs Veh-treated *GFAP-Cul3*<sup>+/+</sup> ( $9.7 \pm 1.7$ ),  $p = 0.0062$ ; for 4EGI-1-treated *Cul3*<sup>+/+</sup> ( $15.3 \pm 1.4$ ) vs 4EGI-1-treated *GFAP-Cul3*<sup>+/+</sup> ( $13.8 \pm 1.3$ ),  $p > 0.9999$ ; Kruskal-Wallis ANOVA followed by Dunn's post hoc test. (E) RMP of recorded CA1 pyramidal neurons from control and *GFAP-Cul3*<sup>+/+</sup> mice.  $n = 18-21$  neurons from 4 mice per each group infused with Veh or 4EGI-1 (50  $\mu$ M, 0.5  $\mu$ l) bilaterally. (F) Representative traces of spikes in CA1 pyramidal neurons evoked by injecting depolarizing currents of 200 pA. (G) Firing rate plotted against increasing injected currents.  $n = 9$  neurons, 3 mice for both genotypes; Veh-treated *Cul3*<sup>+/+</sup> vs Veh-treated *GFAP-Cul3*<sup>+/+</sup>,  $p < 0.001$ ; Veh-treated *GFAP-Cul3*<sup>+/+</sup> vs 4EGI-1-treated *GFAP-Cul3*<sup>+/+</sup>,  $p < 0.3585$ ;  $F_{(3, 256)} = 26.46$ ; Two-way ANOVA followed by Bonferroni's post hoc test. (H) Representative traces of pair-pulse stimulations. (I) PPRs of *GFAP-Cul3*<sup>+/+</sup> neurons were increased by 4EGI-1. PPRs were plotted against inter-stimulus intervals.  $n = 13-14$  neurons, 3 mice for all groups; Veh-treated *Cul3*<sup>+/+</sup> vs Veh-treated *GFAP-Cul3*<sup>+/+</sup>,  $p < 0.001$ ; Veh-treated *GFAP-Cul3*<sup>+/+</sup> vs 4EGI-1-treated *GFAP-Cul3*<sup>+/+</sup>,  $p = 0.0459$ ; 4EGI-1-treated *Cul3*<sup>+/+</sup> vs 4EGI-1-treated *GFAP-Cul3*<sup>+/+</sup>,  $p > 0.9999$ ;  $F_{(3, 153)} = 9.236$ . Two-way ANOVA followed by Bonferroni's post hoc test. (J) Representative traces of NMDAR currents in the presence of MK-801. (K) Normalized NMDAR currents plotted against stimulus number. (L) 4EGI-1 restored low  $\tau$  values in *GFAP-Cul3*<sup>+/+</sup> mice.  $n = 10$  neurons, 3 mice per each groups; Veh-treated *Cul3*<sup>+/+</sup> ( $39.3 \pm 3.2$ ) vs Veh-treated *GFAP-Cul3*<sup>+/+</sup> ( $25.6 \pm 2.7$ ),  $p = 0.031$ ; 4EGI-1-treated *Cul3*<sup>+/+</sup> ( $38.9 \pm 3.5$ ) vs 4EGI-1-treated *GFAP-Cul3*<sup>+/+</sup> ( $36.2 \pm 3.9$ ),  $p = 0.9421$ ; Kruskal-Wallis ANOVA followed by Dunn's post hoc test. (M) Representative 10 successive individual sweeps of EPSCs evoked by minimal stimulation. (N) 4EGI-1 attenuated high success rate, synaptic efficacy, and unaltered synaptic potency in *GFAP-Cul3*<sup>+/+</sup> mice.  $n = 12$  neurons, 3 mice for Veh-treated

*Cul3<sup>f/+</sup>*, n = 13 neurons, 3 mice for and Veh-treated *GFAP-Cul3<sup>f/+</sup>* and 4EGI-1-treated *GFAP-Cul3<sup>f/+</sup>*, n = 14 neurons, 3 mice for 4EGI-1-treated *Cul3<sup>f/+</sup>*; success rate, Veh-treated *Cul3<sup>f/+</sup>* ( $23.2 \pm 3.5$ ) vs Veh-treated *GFAP-Cul3<sup>f/+</sup>* ( $38.3 \pm 2.1$ ), p = 0.0213; 4EGI-1-treated *Cul3<sup>f/+</sup>* ( $24.7 \pm 1.7$ ) vs 4EGI-1-treated *GFAP-Cul3<sup>f/+</sup>* ( $25.1 \pm 1.6$ ), p = 0.741; synaptic efficacy, Veh-treated *Cul3<sup>f/+</sup>* vs Veh-treated *GFAP-Cul3<sup>f/+</sup>*, p = 0.713; 4EGI-1-treated *Cul3<sup>f/+</sup>* vs 4EGI-1-treated *GFAP-Cul3<sup>f/+</sup>*, p = 0.508; synaptic potency, Veh-treated *Cul3<sup>f/+</sup>* ( $5.1 \pm 0.8$ ) vs Veh-treated *GFAP-Cul3<sup>f/+</sup>* ( $7.6 \pm 0.6$ ), p = 0.011; 4EGI-1-treated *Cul3<sup>f/+</sup>* ( $5.1 \pm 0.7$ ) vs 4EGI-1-treated *GFAP-Cul3<sup>f/+</sup>* ( $5.0 \pm 0.5$ ), p = 0.893; Kruskal-Wallis ANOVA followed by Dunn's post hoc test. Data were shown as mean  $\pm$  SEM. \*p < 0.05, \*\*p < 0.01, \*\*\*p < 0.001; ns, no significant difference.

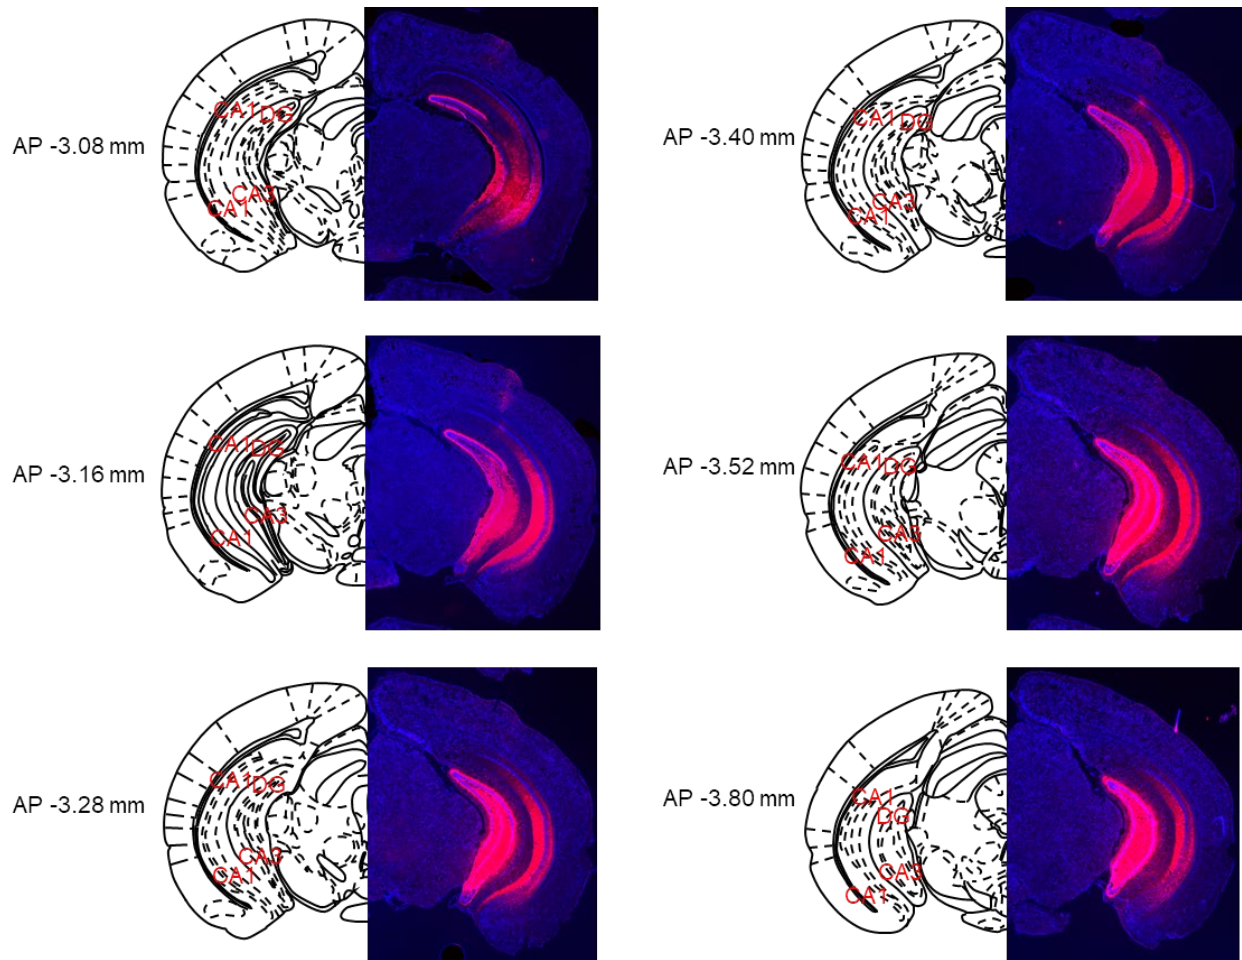

**Figure S9. Validation of the expression of DREADD in vHPC of *NEX-Cul3<sup>fl/+</sup>* mice. Related to Figure 7. Shown were serial sections of vHPC at different coordinates from injected mice. Brain atlas was shown on the left.**

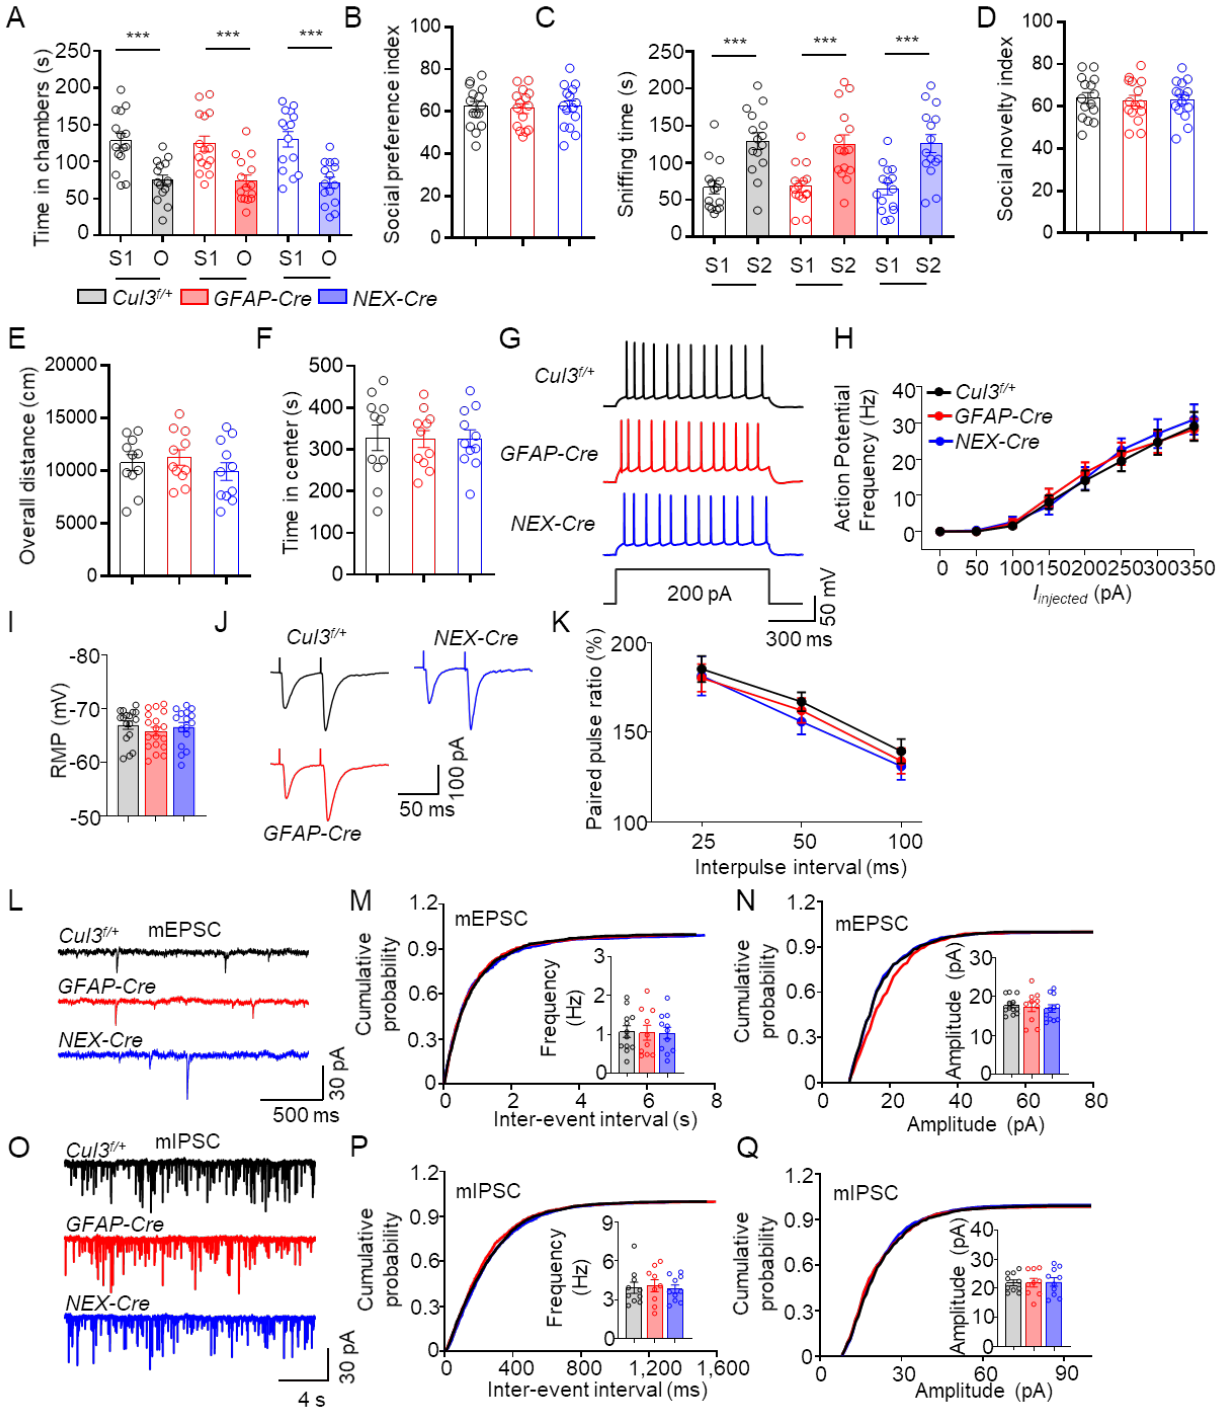

**Figure S10. Validation of behavioral and neuronal properties of *GFAP-Cre* and *NEX-Cre* mice. Related STAR Method.** (A) No difference in social preference between *Cul3<sup>fl/+</sup>*, *GFAP-Cre* and *NEX-Cre* mice.  $n = 15$  mice for each group; *Cul3<sup>fl/+</sup>* S1 ( $128 \pm 10.1$  s) vs *Cul3<sup>fl/+</sup>* O ( $74.7 \pm 7.1$  s),  $p < 0.001$ ; *GFAP-Cre* S1 ( $125 \pm 73.9$  s) vs *GFAP-Cre* O ( $73.9 \pm 7.9$  s),  $p < 0.001$ ; *NEX-Cre* S1 ( $131 \pm 10.4$  s) vs *NEX-Cre* O ( $71.6 \pm 7.5$  s),  $p < 0.001$ ; Two-way ANOVA followed by Bonferroni's post hoc test. (B) No difference in social preference index preference between *Cul3<sup>fl/+</sup>*, *GFAP-Cre* and *NEX-Cre* mice.  $n = 15$  mice per each group;  $p = 0.761$ ; Kruskal-Wallis ANOVA followed by Dunn's post hoc test. (C) No difference in social memory between *Cul3<sup>fl/+</sup>*, *GFAP-Cre* and *NEX-Cre* mice.  $n = 15$  mice for each group; *Cul3<sup>fl/+</sup>* S1 ( $66.9 \pm 8.7$  s) vs *Cul3<sup>fl/+</sup>* S2 ( $129 \pm 11.3$  s),  $p < 0.001$ ; *GFAP-Cre* S1 ( $68.3 \pm 124.9$  s) vs *GFAP-Cre* S2 ( $125 \pm 12.5$  s),  $p < 0.001$ ; *NEX-Cre* S1 ( $64.9 \pm 8.0$  s) vs *NEX-Cre* S2 ( $126 \pm 12.3$  s),  $p < 0.001$ ; Two-way ANOVA followed by Bonferroni's post hoc test. (D) No difference in social preference index preference between

*Cul3<sup>f/+</sup>*, *GFAP-Cre* and *NEX-Cre* mice. n = 15 mice per each group; p = 0.808; Kruskal-Wallis ANOVA followed by Dunn's post hoc test. (E) No difference in total distance traveled. n = 11 mice for each group; p = 0.796; Kruskal-Wallis ANOVA followed by Dunn's post hoc test. (F) Similar time spent in the center. n = 11 mice for each group; p = 0.728; Kruskal-Wallis ANOVA followed by Dunn's post hoc test. (G) Representative traces of spikes evoked by injecting depolarizing currents. (H) Firing rates plotted against increasing injected currents. n = 10 neurons, 3 mice for *Cul3<sup>f/+</sup>* and *GFAP-Cre* mice; n = 9 neurons, 3 mice for *NEX-Cre* mice; p = 0.713; Two-way ANOVA followed by Bonferroni's post hoc test. (I) Comparable resting membrane potentials of CA1 pyramidal neurons. n = 16-18, 3 mice for all genotypes; p = 0.699; One-way ANOVA followed by Tukey's post hoc test. (J) Representative traces of pair-pulse stimulation. (K) PPRs plotted against inter-stimulus intervals. n = 9-10 neurons, 3 mice per each group; p = 0.881; Two-way ANOVA followed by Bonferroni's post hoc test. (L) Representative mEPSC traces in CA1 pyramidal neurons. (M) No difference in mEPSC frequency. n = 12 neurons, 3 mice for *Cul3<sup>f/+</sup>* mice; n = 10 neurons, 3 mice for *GFAP-Cre* mice; n = 11 neurons, 3 mice for *NEX-Cre* mice; p > 0.999; One-way ANOVA followed by Tukey's post hoc test. (N) No difference in mEPSC amplitude. n = 12 neurons, 3 mice for *Cul3<sup>f/+</sup>* mice; n = 10 neurons, 3 mice for *GFAP-Cre* mice; n = 11 neurons, 3 mice for *NEX-Cre* mice; p = 0.911; One-way ANOVA followed by Tukey's post hoc test. (O) Representative mIPSC traces in CA1 pyramidal neurons. (P) No difference in mIPSC frequency. n = 10 neurons, 3 mice for *Cul3<sup>f/+</sup>* and *NEX-Cre* mice; n = 9 neurons, 3 mice for *GFAP-Cre* mice; p = 0.903; One-way ANOVA followed by Tukey's post hoc test. (Q) No difference in mIPSC amplitude. n = 10 neurons, 3 mice for *Cul3<sup>f/+</sup>* and *NEX-Cre* mice; n = 9 neurons, 3 mice for *GFAP-Cre* mice; p > 0.999; One-way ANOVA followed by Tukey's post hoc test. Data were shown as mean  $\pm$  SEM. ns, no significant difference.
